# Supplementary material for: A concentration of visual cortex-like neurons in prefrontal cortex
Source: PubMed Central journal article supplement — Nat Commun. 2024 Aug 14;15:7002. doi: 10.1038/s41467-024-51441-3 (PMC11324908; doi:10.1038/s41467-024-51441-3), 2024-08-14
Supplement: 41467_2024_51441_MOESM3_ESM.pdf [file 41467_2024_51441_MOESM3_ESM.pdf]

Corresponding author(s): Ponce, Carlos R.Last updated by author(s): Jun 28, 2024

## Reporting Summary

Nature Portfolio wishes to improve the reproducibility of the work that we publish. This form provides structure for consistency and transparency in reporting. For further information on Nature Portfolio policies, see our [Editorial Policies](#) and the [Editorial Policy Checklist](#).

### Statistics

For all statistical analyses, confirm that the following items are present in the figure legend, table legend, main text, or Methods section.

n/a | Confirmed

- The exact sample size ( $n$ ) for each experimental group/condition, given as a discrete number and unit of measurement
- A statement on whether measurements were taken from distinct samples or whether the same sample was measured repeatedly
- The statistical test(s) used AND whether they are one- or two-sided  
*Only common tests should be described solely by name; describe more complex techniques in the Methods section.*
- A description of all covariates tested
- A description of any assumptions or corrections, such as tests of normality and adjustment for multiple comparisons
- A full description of the statistical parameters including central tendency (e.g. means) or other basic estimates (e.g. regression coefficient) AND variation (e.g. standard deviation) or associated estimates of uncertainty (e.g. confidence intervals)
- For null hypothesis testing, the test statistic (e.g.  $F$ ,  $t$ ,  $r$ ) with confidence intervals, effect sizes, degrees of freedom and  $P$  value noted  
*Give  $P$  values as exact values whenever suitable.*
- For Bayesian analysis, information on the choice of priors and Markov chain Monte Carlo settings
- For hierarchical and complex designs, identification of the appropriate level for tests and full reporting of outcomes
- Estimates of effect sizes (e.g. Cohen's  $d$ , Pearson's  $r$ ), indicating how they were calculated

*Our web collection on [statistics for biologists](#) contains articles on many of the points above.*

### Software and code

Policy information about [availability of computer code](#)

Data collection

Experimental control and image syntheses conducted with Matlab versions 2019a-2023b, Python 3.7, and MonkeyLogic (NIHM, version 2.2.46)  
Data collected using Plexon Inc. Omniplex Neural Recording Data Acquisition System and software, release 19 and 20  
Eye movement data collection used via ISCAN hardware and software (versions ETL-200, -40)

Data analysis

Analysis code will be available at <https://github.com/PonceLab/visual-PFC>

For manuscripts utilizing custom algorithms or software that are central to the research but not yet described in published literature, software must be made available to editors and reviewers. We strongly encourage code deposition in a community repository (e.g. GitHub). See the Nature Portfolio [guidelines for submitting code & software](#) for further information.

### Data

Policy information about [availability of data](#)

All manuscripts must include a [data availability statement](#). This statement should provide the following information, where applicable:

- Accession codes, unique identifiers, or web links for publicly available datasets
- A description of any restrictions on data availability
- For clinical datasets or third party data, please ensure that the statement adheres to our [policy](#)

Data generated in this study have been deposited in the Zenodo database with DOI 10.5281/zenodo.12565507. The data are available under full access, access can

## Research involving human participants, their data, or biological material

Policy information about studies with [human participants or human data](#). See also policy information about [sex, gender \(identity/presentation\), and sexual orientation](#) and [race, ethnicity and racism](#).

|                                                                    |                                                                                        |
|--------------------------------------------------------------------|----------------------------------------------------------------------------------------|
| Reporting on sex and gender                                        | No human subjects were used in this study. Sex was not considered in the study design. |
| Reporting on race, ethnicity, or other socially relevant groupings | N/A                                                                                    |
| Population characteristics                                         | N/A                                                                                    |
| Recruitment                                                        | N/A                                                                                    |
| Ethics oversight                                                   | N/A                                                                                    |

Note that full information on the approval of the study protocol must also be provided in the manuscript.

## Field-specific reporting

Please select the one below that is the best fit for your research. If you are not sure, read the appropriate sections before making your selection.

Life sciences  Behavioural & social sciences  Ecological, evolutionary & environmental sciences

For a reference copy of the document with all sections, see [nature.com/documents/nr-reporting-summary-flat.pdf](https://nature.com/documents/nr-reporting-summary-flat.pdf)

## Life sciences study design

All studies must disclose on these points even when the disclosure is negative.

|                 |                                                                                                                                                                                                                                                                                                                                                                                                                                                                                                                                                                                                                                                                                                                                                                                                                                                                                                                                                                                                                                                                                                                                                                                                                                                                                                                                                                                          |
|-----------------|------------------------------------------------------------------------------------------------------------------------------------------------------------------------------------------------------------------------------------------------------------------------------------------------------------------------------------------------------------------------------------------------------------------------------------------------------------------------------------------------------------------------------------------------------------------------------------------------------------------------------------------------------------------------------------------------------------------------------------------------------------------------------------------------------------------------------------------------------------------------------------------------------------------------------------------------------------------------------------------------------------------------------------------------------------------------------------------------------------------------------------------------------------------------------------------------------------------------------------------------------------------------------------------------------------------------------------------------------------------------------------------|
| Sample size     | In NHP electrophysiology studies, it is standard practice to collect information from tens to hundreds of cells from a single animal. However, individual animals vary in anatomy, genetics and development. Scientific standards require evidence that results observed in a given neuronal population are not exclusive to the individual organism, as could occur through a quirk of developmental life history. Thus a minimum of two to three monkeys are required for any conclusion to be credible and publishable (two monkeys if the experimental findings are concordant; a third is required in case they are not). Illustrations of this approach include Hubel DH, Wiesel TN. Receptive fields and functional architecture of monkey striate cortex. <i>J Physiol.</i> 1968 Mar;195(1):215-43. doi: 10.1113/jphysiol.1968.sp008455. PMID: 4966457; PMCID: PMC1557912.; Desimone R, Albright TD, Gross CG, Bruce C. Stimulus-selective properties of inferior temporal neurons in the macaque. <i>J Neurosci.</i> 1984 Aug;4(8):2051-62. doi: 10.1523/JNEUROSCI.04-08-02051.1984. PMID: 6470767; PMCID: PMC6564959.; Britten KH, Newsome WT, Shadlen MN, Celebrini S, Movshon JA. A relationship between behavioral choice and the visual responses of neurons in macaque MT. <i>Vis Neurosci.</i> 1996 Jan-Feb;13(1):87-100. doi: 10.1017/s095252380000715x. PMID: 8730992. |
| Data exclusions | After implantation, some array channels were not reliably visually responsive and did not show receptive fields (RFs). This may be due in part to the nature of the array as "floating" (able to move orthogonally to the cortical band), which allows electrode tips to rest outside of the cortical band, or to other factors, such as vIPFC neurons appearing more functionally heterogeneous than visual cortex. We excluded channels that did not yield RFs from analyses in image selectivity and prototype synthesis experiments, due to their dependence on a fixed stimulus position determined by the site's RF. Additionally, due to degradation in signal quality over the lifespan of the array, sites that lost reliably measured RFs were excluded in later experiments.                                                                                                                                                                                                                                                                                                                                                                                                                                                                                                                                                                                                  |
| Replication     | Each experiment mapped receptive fields, assessed image selectivity and attempted image-synthesis using single channels in chronically implanted multielectrode arrays in vIPFC (N=32 per animal). Findings from RF mapping, image selectivity, and prototype synthesis were replicated across two monkeys and across cortical sites.                                                                                                                                                                                                                                                                                                                                                                                                                                                                                                                                                                                                                                                                                                                                                                                                                                                                                                                                                                                                                                                    |
| Randomization   | We used two animals allocated to the same group. By using chronically implanted arrays without prior functional imaging guidance, we achieved a random sampling of neuronal responses in cortex. All sites were tested using the same experimental protocol. This experimental protocol design used pseudo-random block presentation of images for image selectivity. The image synthesis experiments were also based on stochastic algorithms, and depended on each neuronal site responses. The use of two animals allows for covariate control, because the inability to replicate results in one animal's neuronal population using a second animal's neuronal population would suggest that the effects are specific to the particular animal.                                                                                                                                                                                                                                                                                                                                                                                                                                                                                                                                                                                                                                      |
| Blinding        | Blinding was not necessary because investigators cannot control the outcome of each experimental session, as the results are based on a closed feedback loop between neurons and adaptive image generators. In experimental projects like this, there is no intervention group or control group, no test treatment or placebo. By testing the entire randomly sampled population with the same experimental design, dependent variables are reliable.                                                                                                                                                                                                                                                                                                                                                                                                                                                                                                                                                                                                                                                                                                                                                                                                                                                                                                                                    |

## Reporting for specific materials, systems and methods

We require information from authors about some types of materials, experimental systems and methods used in many studies. Here, indicate whether each material, system or method listed is relevant to your study. If you are not sure if a list item applies to your research, read the appropriate section before selecting a response.

## Materials & experimental systems

- |                                     |                                                                 |
|-------------------------------------|-----------------------------------------------------------------|
| n/a                                 | <input checked="" type="checkbox"/> Involved in the study       |
| <input checked="" type="checkbox"/> | <input type="checkbox"/> Antibodies                             |
| <input checked="" type="checkbox"/> | <input type="checkbox"/> Eukaryotic cell lines                  |
| <input checked="" type="checkbox"/> | <input type="checkbox"/> Palaeontology and archaeology          |
| <input type="checkbox"/>            | <input checked="" type="checkbox"/> Animals and other organisms |
| <input checked="" type="checkbox"/> | <input type="checkbox"/> Clinical data                          |
| <input checked="" type="checkbox"/> | <input type="checkbox"/> Dual use research of concern           |
| <input checked="" type="checkbox"/> | <input type="checkbox"/> Plants                                 |

## Methods

- |                                     |                                                           |
|-------------------------------------|-----------------------------------------------------------|
| n/a                                 | <input checked="" type="checkbox"/> Involved in the study |
| <input checked="" type="checkbox"/> | <input type="checkbox"/> ChIP-seq                         |
| <input checked="" type="checkbox"/> | <input type="checkbox"/> Flow cytometry                   |
| <input checked="" type="checkbox"/> | <input type="checkbox"/> MRI-based neuroimaging           |

## Animals and other research organisms

Policy information about [studies involving animals](#); [ARRIVE guidelines](#) recommended for reporting animal research, and [Sex and Gender in Research](#)

|                         |                                                                                                                                                                                                                                                                                                                                                                                                                                                |
|-------------------------|------------------------------------------------------------------------------------------------------------------------------------------------------------------------------------------------------------------------------------------------------------------------------------------------------------------------------------------------------------------------------------------------------------------------------------------------|
| Laboratory animals      | <input type="text" value="Two male rhesus macaques, 9-10 years of age, were used. They were purchased through a federally approved vendor."/>                                                                                                                                                                                                                                                                                                  |
| Wild animals            | <input type="text" value="None"/>                                                                                                                                                                                                                                                                                                                                                                                                              |
| Reporting on sex        | <input type="text" value="The reported findings were obtained using only male macaques due to difficulty in obtaining female laboratory macaques for purposes beyond breeding. Healthy female macaques generally enter breeding programs, making them less readily available for other research objectives. Despite this limitation, major sex differences in the anatomical structure of the primate visual system have not been reported."/> |
| Field-collected samples | <input type="text" value="None"/>                                                                                                                                                                                                                                                                                                                                                                                                              |
| Ethics oversight        | <input type="text" value="All procedures received ethical approval by the Washington University School of Medicine and the Harvard Medical School Institutional Animal Care and Use Committees and conformed to NIH guidelines provided in the Guide for the Care and Use of Laboratory Animals."/>                                                                                                                                            |

Note that full information on the approval of the study protocol must also be provided in the manuscript.

## Plants

|                       |                                  |
|-----------------------|----------------------------------|
| Seed stocks           | <input type="text" value="N/A"/> |
| Novel plant genotypes | <input type="text" value="N/A"/> |
| Authentication        | <input type="text" value="N/A"/> |
